# Supplementary material for: Amorphous and outstandingly stable Ni(OH)2·0.75H2O@Ni(OH)2/FeOOH heterojunction nanosheets for efficient oxygen evolution performance
Source: Royal Society of Chemistry journal article supplement (doi:10.1039/d4cc04775c), 2025-01-01
Supplement: d4cc04775c1.pdf [file d4cc04775c1.pdf]

**Electronic Supplementary Information for**  
**Amorphous and outstandingly stable**  
**Ni(OH)<sub>2</sub>·0.75H<sub>2</sub>O@Ni(OH)<sub>2</sub>/FeOOH heterojunction nanosheets for**  
**efficient oxygen evolution performance**

Tingyi Huang<sup>‡</sup>, Yawen Liu<sup>‡</sup>, Ziyu Zhao, Yuchan Liu, Rongkai Ye \* and Jianqiang Hu\*

School of Chemistry and Chemical Engineering, Key Lab of Fuel Cell Technology of Guangdong Province, South China University of Technology, Guangzhou, 510640, P. R. China. E-mail: [jqhusc@scut.edu.cn](mailto:jqhusc@scut.edu.cn), [kairyscut@scut.edu.cn](mailto:kairyscut@scut.edu.cn)

<sup>‡</sup> Tingyi Huang and Yawen Liu contributed equally to this work.

## 1. Experimental section

### 1.1 Chemicals

Nickel nitrate hexahydrate ( $\text{Ni}(\text{NO}_3)_2 \cdot 6\text{H}_2\text{O}$ , 98%), ferric chloride hexahydrate ( $\text{FeCl}_3 \cdot 6\text{H}_2\text{O}$ , 98%), urea ( $\text{CH}_4\text{N}_2\text{O}$ , 98%), ammonium fluoride ( $\text{NH}_4\text{F}$ , 99%), sodium hydroxide ( $\text{NaOH}$ ) and commercial ruthenium dioxide ( $\text{RuO}_2$ , 99.9%) were purchased from Aladdin (Shanghai, China), and used without any further purification. The solutions in present work were prepared by ultra-pure water ( $>18.0 \text{ M}\Omega \cdot \text{cm}$ ).

### 1.2 Preparation of electrocatalysts

#### 1.2.1 Preparation of $\text{Ni}(\text{NO}_3)_2 \cdot 0.75\text{H}_2\text{O}@\text{Ni}(\text{OH})_2$ nanosheets

Ni foam (NF) was cut into rectangular pieces ( $3 \times 2 \text{ cm}^2$ ) and then carefully pretreated through complying following steps before each experiment: firstly, the NF slices were ultrasonicated in 3.0 M HCl for 20 min to remove oxide layer on surface. Then the NF slices were successively ultrasonicated in acetone, ethanol and water for 10 min, respectively.

0.491 g  $\text{Ni}(\text{NO}_3)_2 \cdot 6\text{H}_2\text{O}$ , 0.451 g urea and 0.111 g  $\text{NH}_4\text{F}$  were dissolved in 30 mL ultrapure water. Then, a piece of treated NF was completely immersed into the solution, and the reaction was heated in a sealed stainless steel autoclave at  $100 \text{ }^\circ\text{C}$  for 6 h. After the reaction, the autoclave was cooled naturally to room temperature. Subsequently, the NF was removed from the react solution and washed three times with water and ethanol. The as-prepared electrocatalyst was dried under vacuum at  $60 \text{ }^\circ\text{C}$  to obtain the  $\text{Ni}(\text{OH})_2 \cdot 0.75\text{H}_2\text{O}@\text{Ni}(\text{OH})_2$  nanosheets *in situ* grown on NF, which would be cut into  $1 \times 1 \text{ cm}^2$  for further use.

#### 1.2.2 Preparation of the $\text{Ni}(\text{OH})_2 \cdot 0.75\text{H}_2\text{O}@\text{Ni}(\text{OH})_2/\text{FeOOH}$ nanosheets

Amorphous FeOOH was electrodeposited on the surface of as-prepared  $\text{Ni}(\text{OH})_2 \cdot 0.75\text{H}_2\text{O}@\text{Ni}(\text{OH})_2$  nanosheets through using Pt sheet and saturated calomel electrode as counter electrode and reference electrode, respectively. The electrodeposition was performed in 0.1 M  $\text{Fe}(\text{NO}_3)_3$  aqueous solution at  $-1.0 \text{ V}$  (vs. saturated calomel electrode).

### 1.2.3 Preparation of RuO<sub>2</sub>/NF

The commercial RuO<sub>2</sub> (10 mg) was dispersed into a mixture of 980  $\mu$ L ethanol and 20  $\mu$ L Nafion (5%), and the mixture was ultrasonicated for 30 min to form homogeneous ink. Then, a certain amount ink was loaded onto nickel foam and dried at room temperature. The loading amount of RuO<sub>2</sub> on the 1\*1 cm<sup>2</sup> NF was about 2.5 mg·cm<sup>-2</sup>, which was the same amount with the as-prepared electrocatalysts.

### 1.3 Characterization

The morphology and structure of the samples were characterized by scanning electron microscopy (SEM, Hitachi SU8010, 5kV) and transmission electron microscopy (TEM, JEOL, JEM-1400, 120 kV). The crystallinity and purity of the materials was evaluated qualitatively by thin film powder X-ray diffraction (XRD, Bruker, D8 Advance, Germany) equipped with a Cu K $\alpha$  radiation source ( $\lambda=1.5406$  Å), and the test conditions were set as  $2\theta$  range from 5° to 50° at scanning rate of 5°·min<sup>-1</sup>. The surface properties of the products were analyzed with X-ray photoelectron spectroscopy (XPS, Nexsa, Thermo Fisher Scientific, America) with a Mg K $\alpha$  X-ray source. The content of Ni and Fe in different specimens was determined by inductively couple plasma-mass spectrometer (ICP-MS, iCAP Qc, Thermo Fisher Scientific).

### 1.4 Electrochemical measurements

Electrochemical measurements were performed on a CHI 760E electrochemistry workstation with a three-electrode system. The saturated Ag/AgCl and Pt plate electrode were used as the reference and counter electrode, respectively. The as-prepared catalysts on NF were used as working electrodes. The measured potentials were converted to reversible hydrogen electrode (RHE),  $E_{\text{RHE}} = E_{\text{Ag/AgCl}} + 0.21 + 0.059 \times \text{pH}$ . Linear sweep voltammetry (LSV) curves were recorded in 1.0 M KOH (pH=13.4) aqueous solutions with 95% *iR*-compensation at a scan rate of 2 mV·s<sup>-1</sup>. Tafel slopes were calculated by linear regression using the equation  $\eta = b \cdot \log|j| + a$ , where  $\eta$  (V) is the overpotential,  $j$  is the current density (mA·cm<sup>-2</sup>), respectively. The electrochemically active surface areas were investigated by double-layer capacitance ( $C_{\text{dl}}$ ) in the potential range from 0-0.1 V vs.  $E_{\text{Ag/AgCl}}$  with

different scan rates (20, 40, 80, 120, 160 and 200  $\text{mV}\cdot\text{s}^{-1}$ ). The electrochemical impedance spectroscopy (EIS) was measured in 1.0 M KOH aqueous solutions with a frequency range from  $10^5$  to 0.01 Hz at 1.45 V vs. RHE. The stability measurements were conducted in 1 M KOH solution at room temperature and the current density of  $100 \text{ mA}\cdot\text{cm}^{-2}$ .

## 2. Supplementary figures

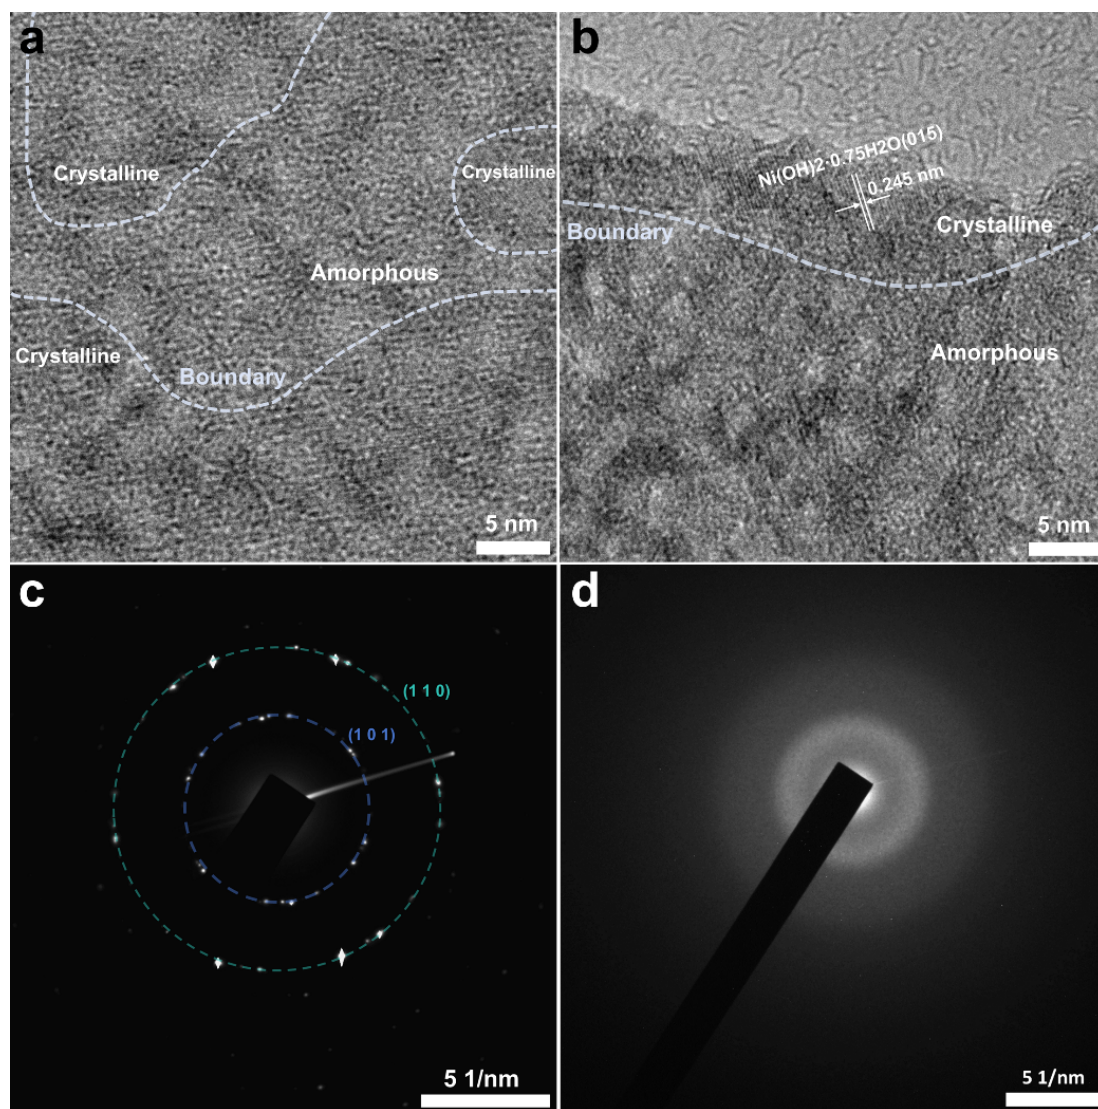

**Fig. S1** (a,b) HRTEM images and (c) selected area electron diffraction pattern of Ni(OH)<sub>2</sub>·0.75H<sub>2</sub>O@Ni(OH)<sub>2</sub>/FeOOH nanosheets. (d) Selected area electron diffraction pattern of FeOOH/NF.

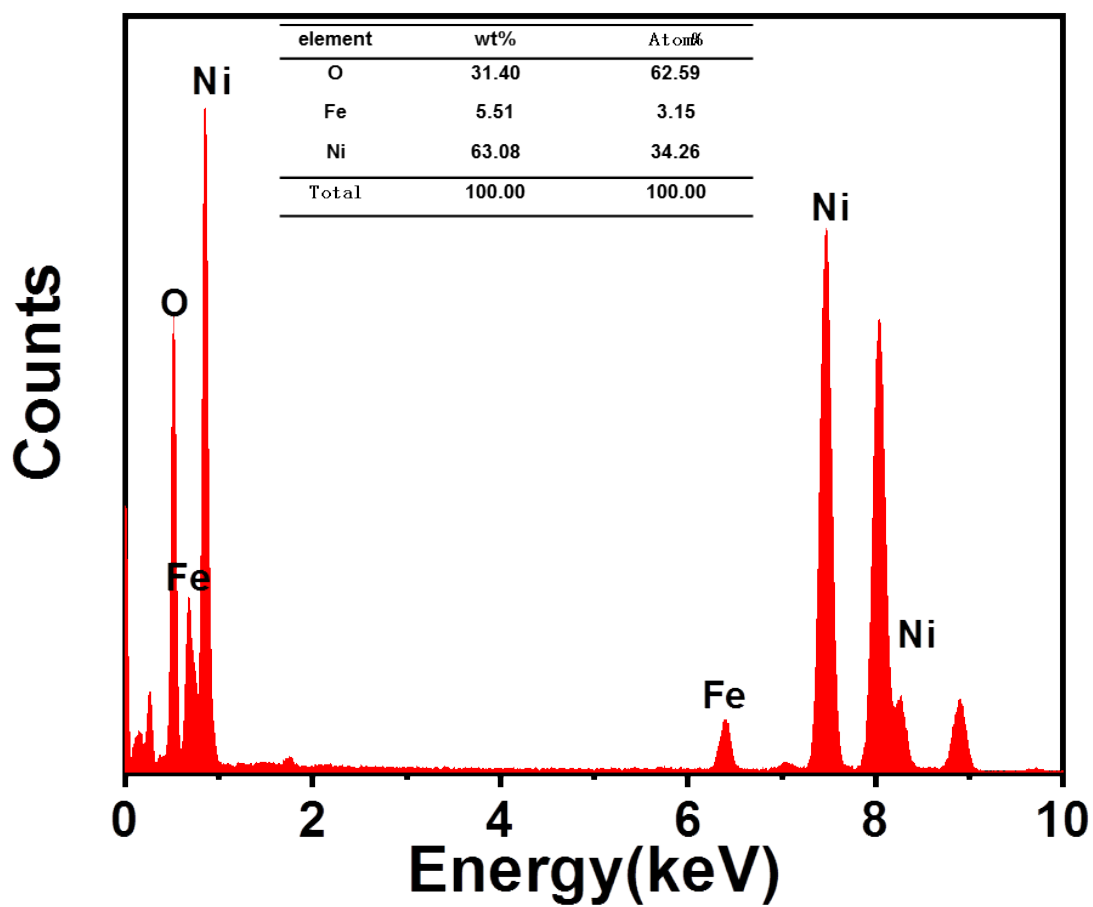

Fig. S2 EDX pattern of the  $\text{Ni}(\text{OH})_2 \cdot 0.75\text{H}_2\text{O} @ \text{Ni}(\text{OH})_2 / \text{FeOOH}$  heterojunction nanosheets fabricated by the present method.

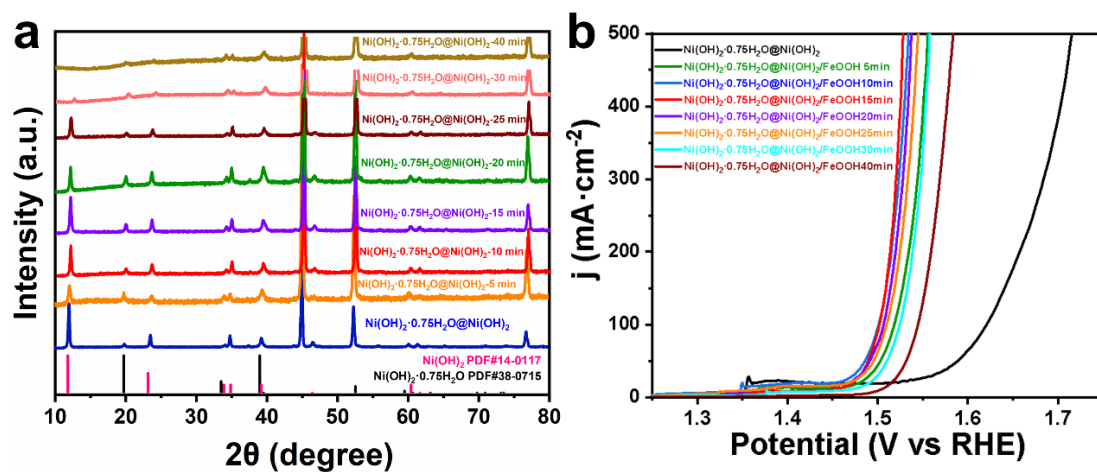

**Fig. S3** (a) XRD patterns and (b) OER performance in 1.0 M KOH of the Ni(OH)<sub>2</sub>·0.75H<sub>2</sub>O@Ni(OH)<sub>2</sub>/FeOOH nanosheets prepared using different time of electrodeposition.

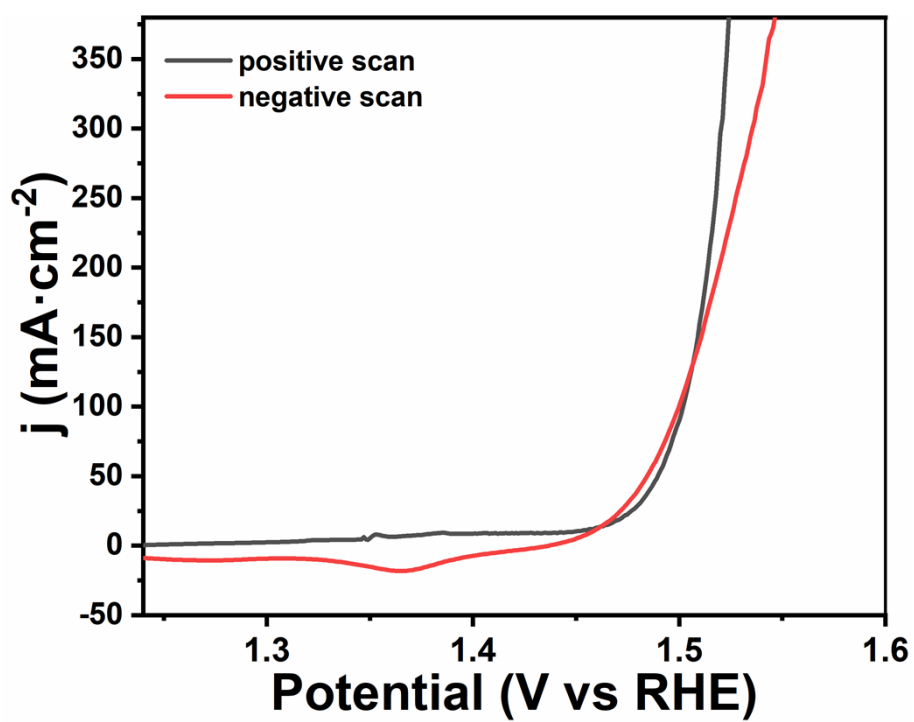

**Fig. S4** The positive and negative LSV curves of the  $\text{Ni(OH)}_2 \cdot 0.75\text{H}_2\text{O} @ \text{Ni(OH)}_2 / \text{FeOOH}$  nanosheets in 1.0 M KOH.



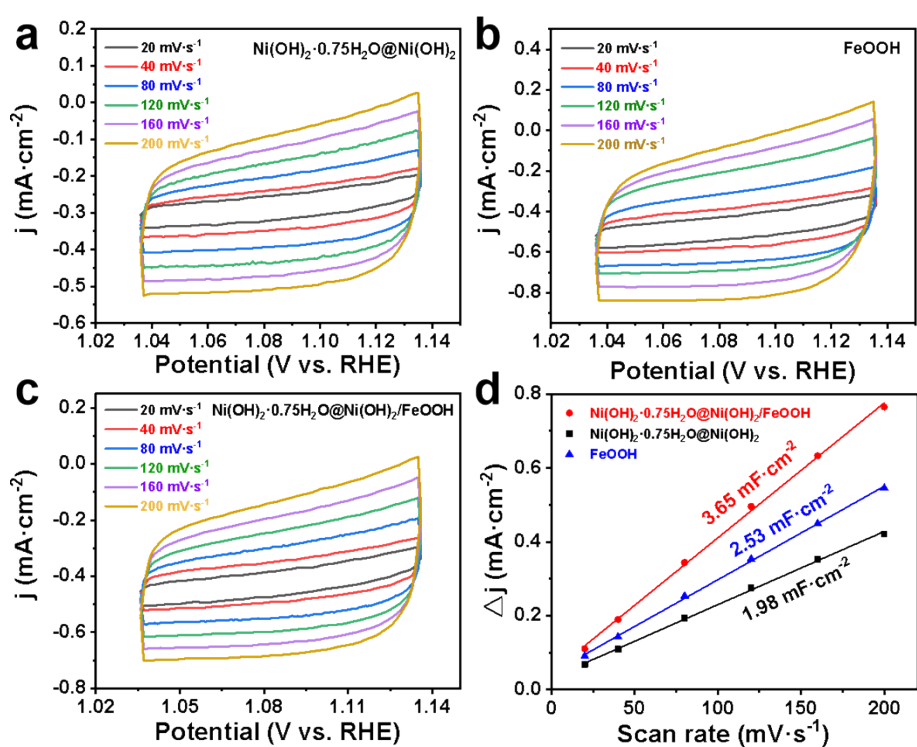

**Fig. S5** CV curves of (a) Ni(OH)<sub>2</sub>·0.75H<sub>2</sub>O@Ni(OH)<sub>2</sub>, (b) FeOOH and (c) Ni(OH)<sub>2</sub>·0.75H<sub>2</sub>O@Ni(OH)<sub>2</sub>/FeOOH nanosheets. (d) Plots of current density difference ( $\Delta j$ ) at 1.08 V (vs. RHE) against scan rates for calculation of double layer capacitance ( $C_{dl}$ ).

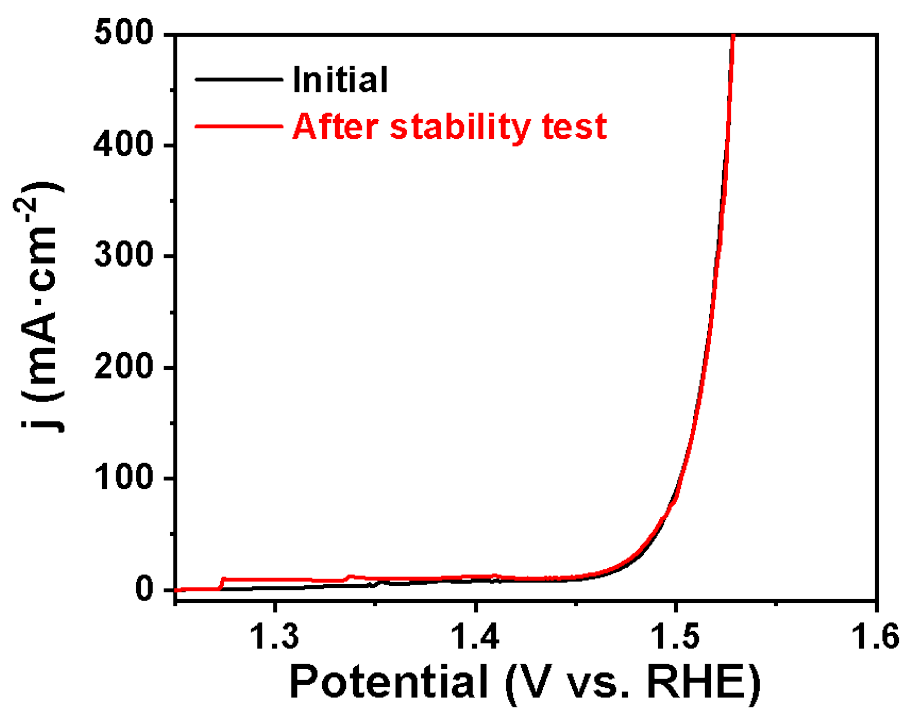

**Fig. S6** OER performance of the Ni(OH)<sub>2</sub>·0.75H<sub>2</sub>O@Ni(OH)<sub>2</sub>/FeOOH nanosheets before and after stability measurement in 1.0 M KOH.

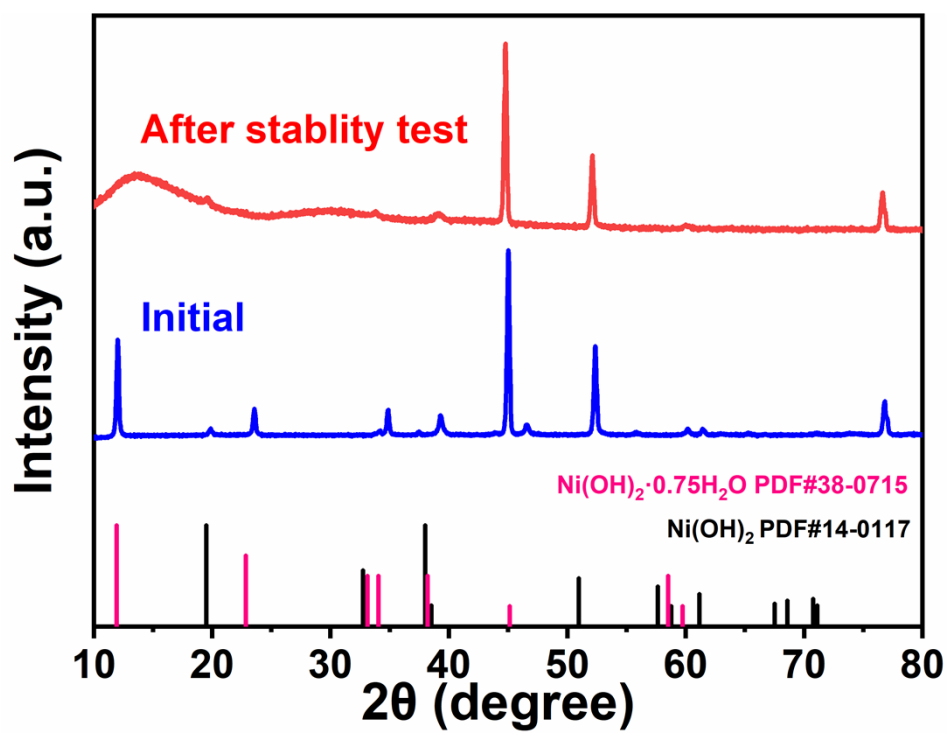

**Fig. S7** XRD patterns of the Ni(OH)<sub>2</sub>·0.75H<sub>2</sub>O@Ni(OH)<sub>2</sub>/FeOOH nanosheets before and after stability measurement for 100 h.

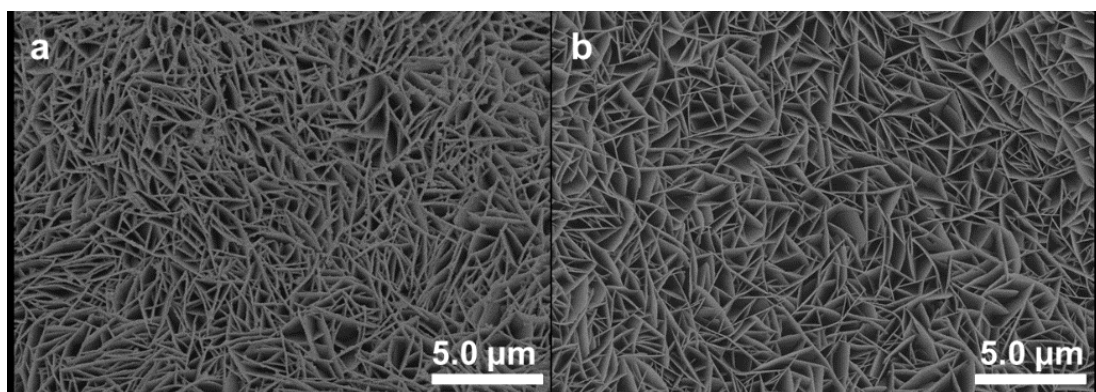

**Fig. S8** SEM images of Ni(OH)<sub>2</sub>·0.75H<sub>2</sub>O@Ni(OH)<sub>2</sub>/FeOOH (a) before and (b) after stability measurements.

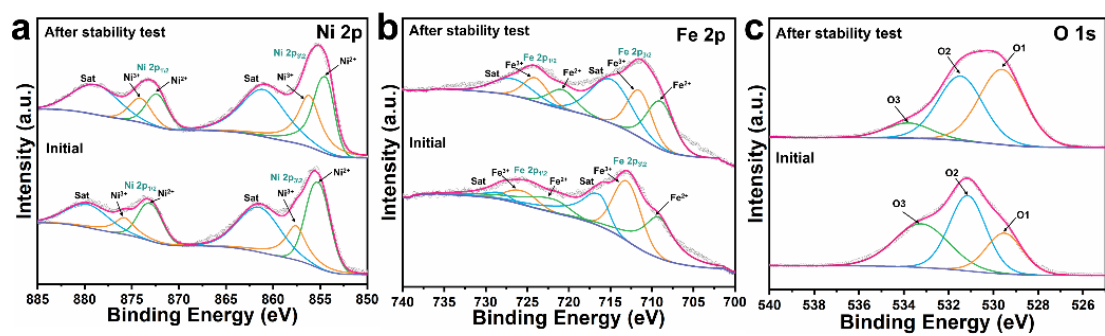

**Fig. S9** XPS high-resolution spectra of (a) Ni 2p, (b) Fe 2p and (c) O 1s of the  $\text{Ni}(\text{OH})_2 \cdot 0.75\text{H}_2\text{O} @ \text{Ni}(\text{OH})_2 / \text{FeOOH}$  nanosheets before and after stability measurements.

**Table S1** EIS results of different electrocatalysts.

| Catalysts                                                            | Solution impedance | Charge transfer impedance |
|----------------------------------------------------------------------|--------------------|---------------------------|
|                                                                      | $R_s$ ( $\Omega$ ) | $R_{ct}$ ( $\Omega$ )     |
| FeOOH                                                                | 1.94               | 1.22                      |
| Ni(OH) <sub>2</sub> ·0.75H <sub>2</sub> O@Ni(OH) <sub>2</sub>        | 1.98               | 13.35                     |
| Ni(OH) <sub>2</sub> ·0.75H <sub>2</sub> O@Ni(OH) <sub>2</sub> /FeOOH | 1.97               | 0.43                      |

**Table S2** Comparison of OER activities of art non-noble-metal electrocatalysts.

| Catalyst                                                             | Overpotential (mV)                  | Tafel slope (mV dec <sup>-1</sup> ) | Substrates   | Refs.            |
|----------------------------------------------------------------------|-------------------------------------|-------------------------------------|--------------|------------------|
| Ni(OH) <sub>2</sub> ·0.75H <sub>2</sub> O@Ni(OH) <sub>2</sub> /FeOOH | $\eta_{50}=256$<br>$\eta_{100}=270$ | 44                                  | Ni foam      | <b>This work</b> |
| (Ni, Fe)Se@NiFe-LDH                                                  | $H_{100}=253$                       | 42                                  | Ni foam      | 1                |
| NiFe <sub>3</sub> Nb <sub>2</sub> -OH                                | $\eta_{100}=294$                    | 47                                  | Ni foam      | 2                |
| NiFe-HD/pre-NF                                                       | $\eta_{100}=256$                    | 81                                  | Ni foam      | 3                |
| CoP/P-NiO/NF                                                         | $\eta_{100}=265$                    | 101.8                               | Ni foam      | 4                |
| NiCo <sub>1.09</sub> BDC-Fe <sub>0.25</sub> /NF                      | $\eta_{100}=278$                    | 43                                  | Ni foam      | 5                |
| W-Ni <sub>3</sub> S <sub>2</sub> /Ni <sub>7</sub> S <sub>6</sub>     | $H_{100}=202$                       | 55                                  | Ni foam      | 6                |
| Ni-Fe-Se/NF                                                          | $\eta_{100}=222$                    | 39                                  | Ni foam      | 7                |
| Fe <sub>4</sub> Ni-Se/NF                                             | $\eta_{10}=207$                     | 36.7                                | Ni foam      | 8                |
| Ni(OH) <sub>2</sub> -Fe H-STs-Ni <sub>3</sub> Fe <sub>1</sub> /NF    | $\eta_{10}=200$                     | 53                                  | Ni foam      | 9                |
| Fe <sub>0.5</sub> Ni <sub>0.5</sub> Pc-CP                            | $\eta_{10}=317$                     | 116                                 | carbon paper | 10               |
| NiFe <sub>0.05</sub> -N-CP                                           | $\eta_{10}=238$                     | 76                                  | carbon paper | 11               |
| $\alpha$ -Ni(OH) <sub>2</sub> thin films                             | $H_{10}=310$                        | 42.6                                | GCE          | 12               |
| Ni(OH) <sub>2</sub> NPs@CSZ                                          | $\eta_{10}=212$                     | 64.2                                | GCE          | 13               |
| Ni <sub>0.25</sub> Co <sub>0.75</sub> (OH) <sub>2</sub>              | $\eta_{10}=352$                     | 72                                  | GCE          | 14               |
| Ni-N@5min nanoclusters                                               | $\eta_{100}=294$                    | 42.5                                | GCE          | 15               |

## References

- 1 J. Hu, Y. Q. Liang, S. L. Wu, Z. Y. Li, C. S. Shi, S. Y. Luo, H. J. Sun, S. L. Zhu and Z. D. Cui, *Mater. Today Nano*, 2022, **17**, 100150.
- 2 D. Hu, X. Wang, X. Chen, Y. Wang, A. N. Hong, J. Zhong, X. Bu, P. Feng and T. Wu, *J. Mater. Chem. A*, 2020, **8**, 11255–11260.
- 3 B. Wu, Z. Yang, X. Dai, X. Yin, Y. Gan, F. Nie, Z. Ren, Y. Cao, Z. Li and X. Zhang, *Dalton Trans.*, 2021, **50**, 12547–12554.
- 4 F. Nie, Z. Yang, X. Dai, Z. Ren, X. Yin, Y. Gan, B. Wu, Y. Cao, R. Cai and X. Zhang, *J. Colloid Interface Sci.*, 2022, **621**, 213–221.
- 5 Q. Liang, Y. Liu, Z. Xue, Z. Zhao, G. Li and J. Hu, *Chem. Commun.*, 2022, **58**, 6966–6969.
- 6 Z. Xue, Y. Liu, Q. Liu, Y. Zhang, M. Yu, Q. Liang, J. Hu and G. Li, *J. Mater. Chem. A*, 2022, **10**, 3341–3345.
- 7 X. Yi, X. He, F. Yin, B. Chen, G. Li and H. Yin, *Dalton Trans.*, 2020, **49**, 6764–6775.
- 8 C. Jin, M. Hou, X. Li, D. Liu, D. Qu, Y. Dong, Z. Xie and C. Zhang, *J. Electroanal. Chem.*, 2022, **906**, 116014.
- 9 Y. Ding, B.-Q. Miao, Y. Zhao, F.-M. Li, Y.-C. Jiang, S.-N. Li and Y. Chen, *Chin. J. Catal.*, 2021, **42**, 271–278.
- 10 D. Qi, X. Chen, W. Liu, C. Liu, W. Liu, K. Wang and J. Jiang, *Inorg. Chem. Front.*, 2020, **7**, 642–646.
- 11 Y. Xu, Z. Cheng, J. Jiang, J. Du and Q. Xu, *Chem. Commun.*, 2021, **57**, 13170–13173.
- 12 S. Tao, Q. Wen, W. Jaegermann and B. Kaiser, *ACS Catal.*, 2022, **12**, 1508–1519.
- 13 D. Hu, X. Wang, X. Chen, Y. Wang, A. N. Hong, J. Zhong, X. Bu, P. Feng and T. Wu, *J. Mater. Chem. A*, 2020, **8**, 11255–11260.
- 14 Y. Wang, C. Yang, Y. Huang, Z. Li, Z. Liang and G. Cao, *J. Mater. Chem. A*, 2020, **8**, 6699–6708.
- 15 T. Yu, Y. Hou, P. Shi, Y. Yang, M. Chen, W. Zhou, Z. Jiang, X. Luo, H. Zhou and C. Yuan, *Inorg. Chem.*, 2022, **61**, 2360–2367.
